# Supplementary material for: Structural analysis of the complex between influenza B nucleoprotein and human importin-α
Source: PubMed Central journal article supplement (PMC5719345; doi:10.1038/s41598-017-17458-z), 2017-12-07

# **Structural analysis of the complex between influenza B nucleoprotein and human importin- $\alpha$**

Alice LABARONNE<sup>1§</sup>, Sigrid MILLES<sup>1§</sup>, Amélie DONCHET<sup>1</sup>, Malene Ringkjøbing JENSEN<sup>1</sup>, Martin BLACKLEDGE<sup>1</sup>, Jean-Marie BOURHIS<sup>1</sup>, Rob WH RUIGROK<sup>1</sup> & Thibaut CREPIN<sup>1\*</sup>

<sup>1</sup> Univ. Grenoble Alpes, CNRS, CEA, IBS, F-38000 Grenoble

**Supplementary information**

### Supplementary Figure 1

**Conformational propensities of B/NP<sub>TAIL</sub>.** (a) Local conformational propensities of a set of 200 conformers describing the structural propensities of B/NP<sub>TAIL</sub> as derived from a combination of Flexible-Meccano and ASTEROIDS using chemical shifts (grey bars) of B/NP<sub>TAIL</sub> and propensities as expected from a statistical coil (black lines). Categories as described in Fig. 2:  $\beta$ -sheet ( $\beta$ S), poly-proline ( $\beta$ P), right ( $\alpha$ R) and left handed ( $\alpha$ L). (b) Secondary chemical shifts as obtained from B/NP<sub>TAIL</sub> assignment (grey bars) and back calculated from the ASTEROIDS ensemble (red lines).

### Supplementary Figure 2

**Interaction of B/NP with importin- $\alpha$ 7.** SDS-PAGE gels (Tris-Glycine, 4-20 % polyacrylamide) stained with coomassie blue of the control experiments done on (a) a Superdex<sup>TM</sup> 200 increase 10/300GL column for B/NP alone, importin- $\alpha$ 7 alone and B/NP<sub>CORE</sub> alone and on (b) a Superdex<sup>TM</sup> 75 10/300GL column for B/NP<sub>TAIL</sub> and importin- $\alpha$ 7.

### Supplementary Figure 3

#### **Homogeneous sample analysis of recombinant B/NP<sub>CORE</sub>.**

The MALLS run was performed using a Superdex<sup>TM</sup> 200 increase 10/300GL (GE Healthcare). Sample injection and buffer flow was controlled by a Hitachi L2130 pump, following the SEC column was a L-2400 UV detector (Hitachi), Optilab T-rEX refractometer (Wyatt technologies) and a DAWN HELEOS-II multi angle light scattering detector (Wyatt technologies). Prior to injection, columns and systems were equilibrated in 5 to 10 column volumes of running buffer 20 mM Tris-HCl pH 7.5, 150 mM NaCl and 5 mM  $\beta$ -ME. A 50  $\mu$ L injection was performed using a recombinant B/NP<sub>CORE</sub> sample concentrated at 3.2 mg.mL<sup>-1</sup> with a constant flow rate of 0.5 mL.min<sup>-1</sup>. Accurate MALLS mass prediction was performed with the Astra software (Wyatt Technologies). Curves were represented with Graphpad

(Prism). The SEC-MALLS chromatograms with the UV signal is shown as a backtrace and molecular weight (red) estimate below the peak.

#### **Supplementary Figure 4**

**R<sub>g</sub> determination by Guinier extrapolation.** Guinier plots of the scattering curves are shown with a line of best fit and residuals for, **(a)** importin- $\alpha$ 7, **(b)** B/NP, **(c)** the B/NP<sub>TAIL</sub>:importin- $\alpha$ 7 complex and **(d)** the B/NP:importin- $\alpha$ 7 complex. The slopes of fits are equal to  $-R_g^2/3$ , and the vertical intercept is equal to the log of the zero-angle scattering intensity  $I(0)$ . The maximum  $q$  in the Guinier fits was determined for  $qR_g$  values less than 1.3. All fits residuals (displayed in the bottom panel) are randomly distributed around zero.

Supplementary Figure 1

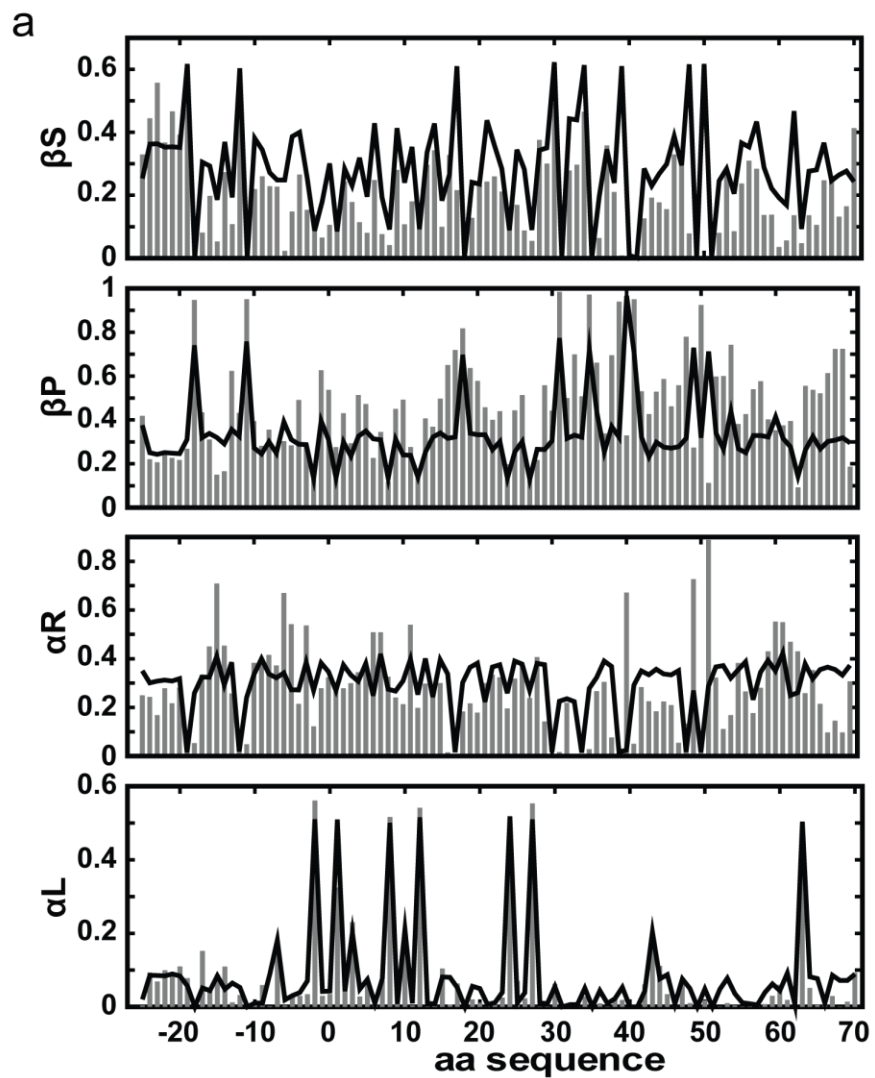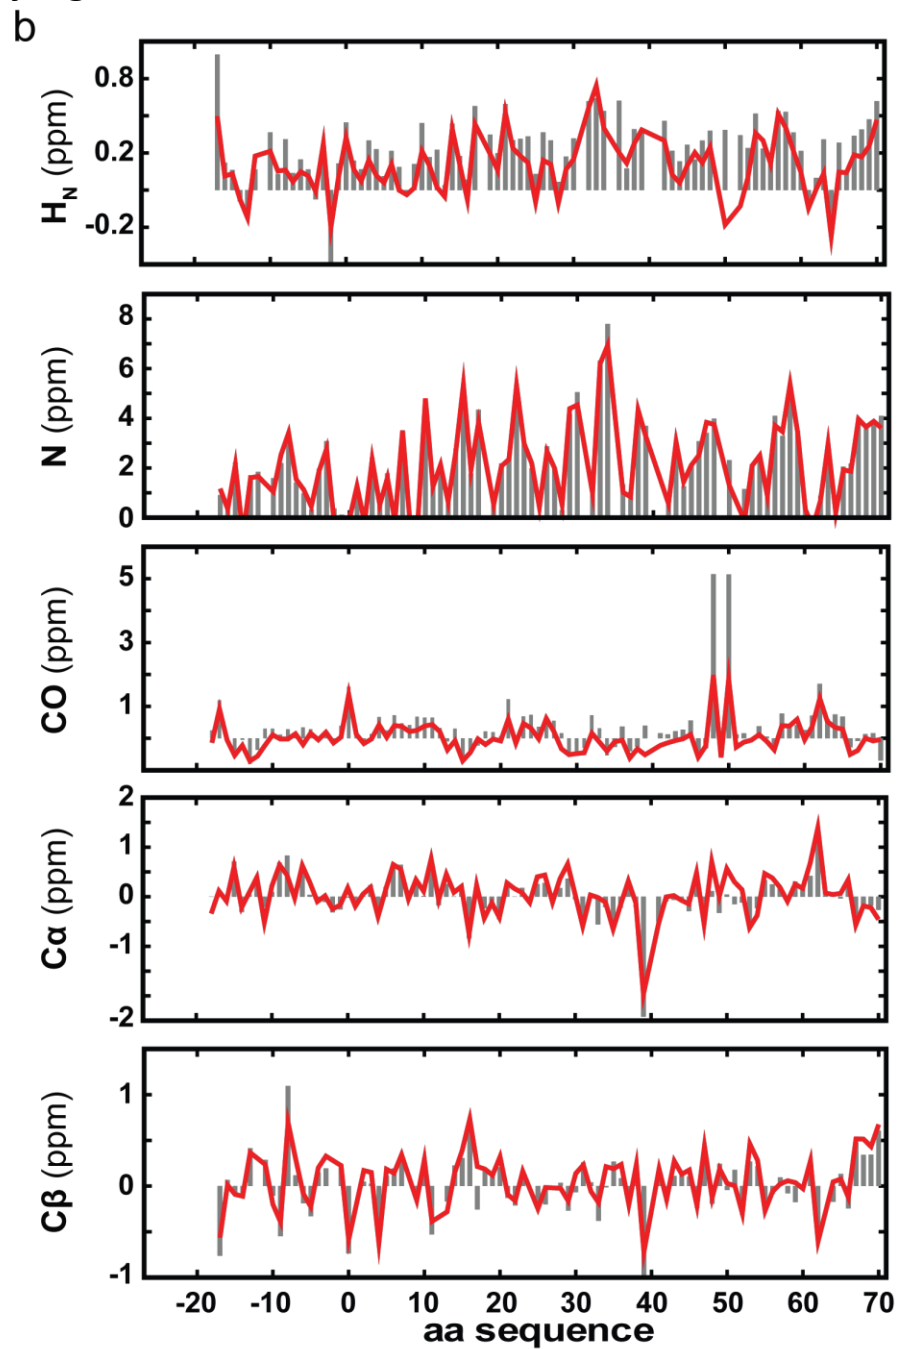

a

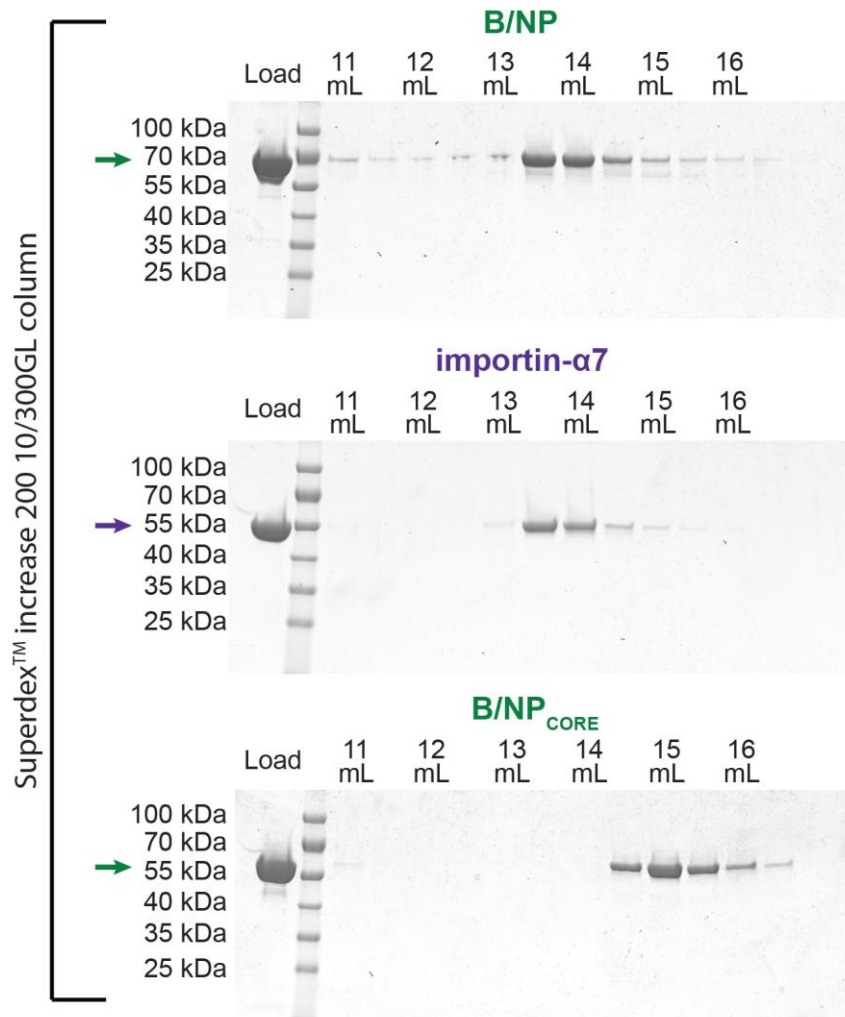

b

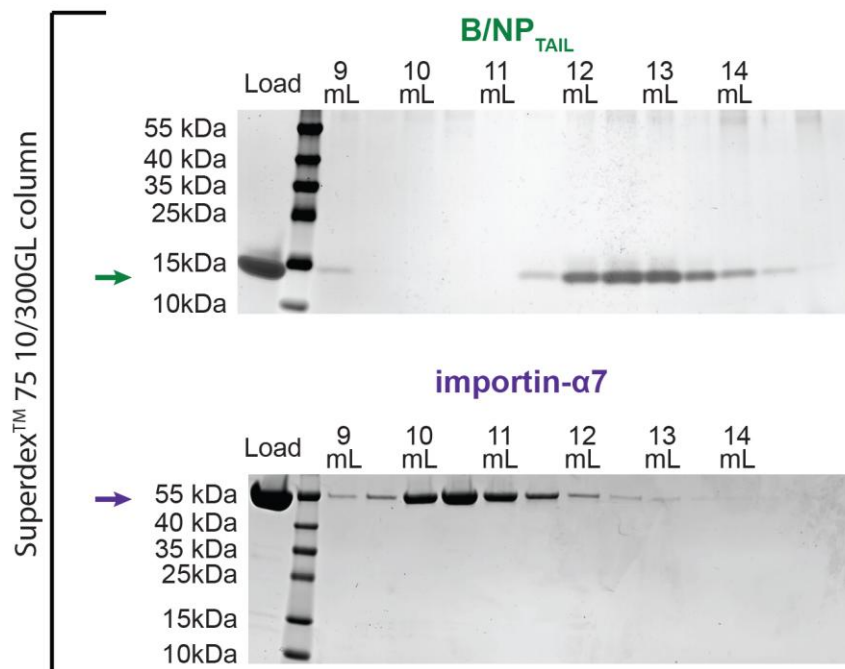

Supplementary Figure 3

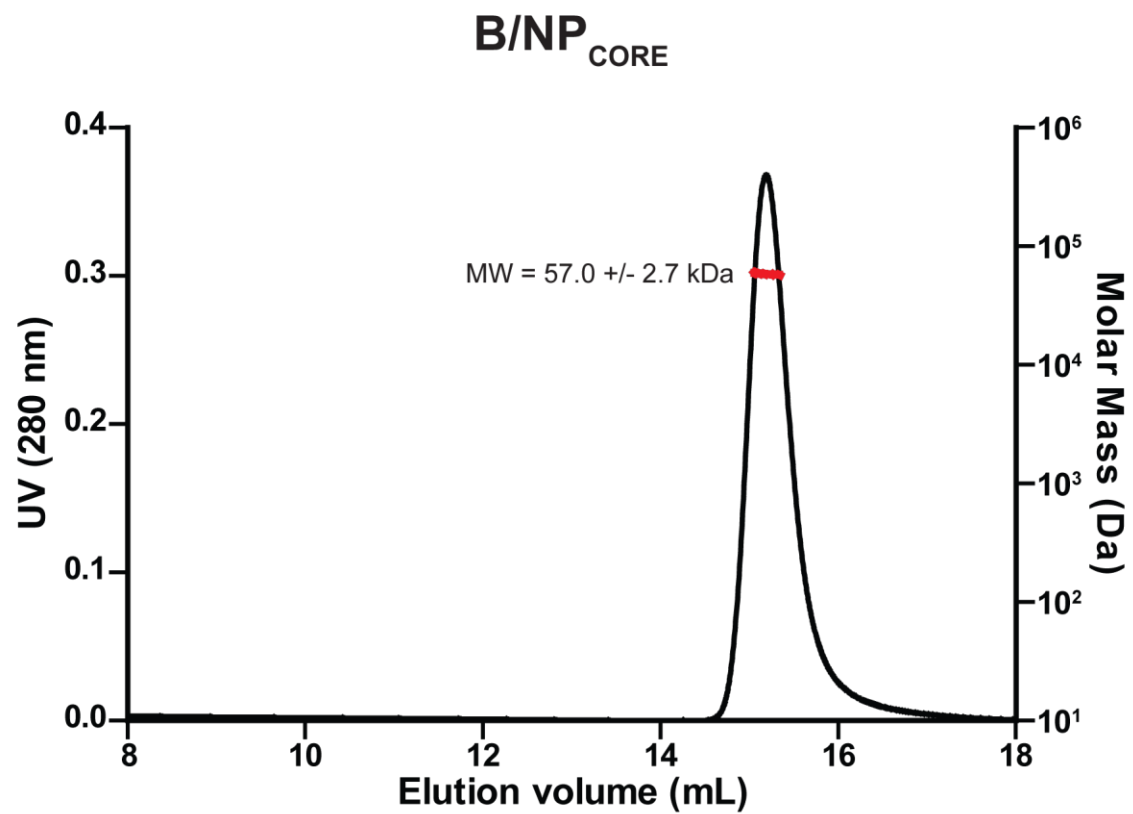

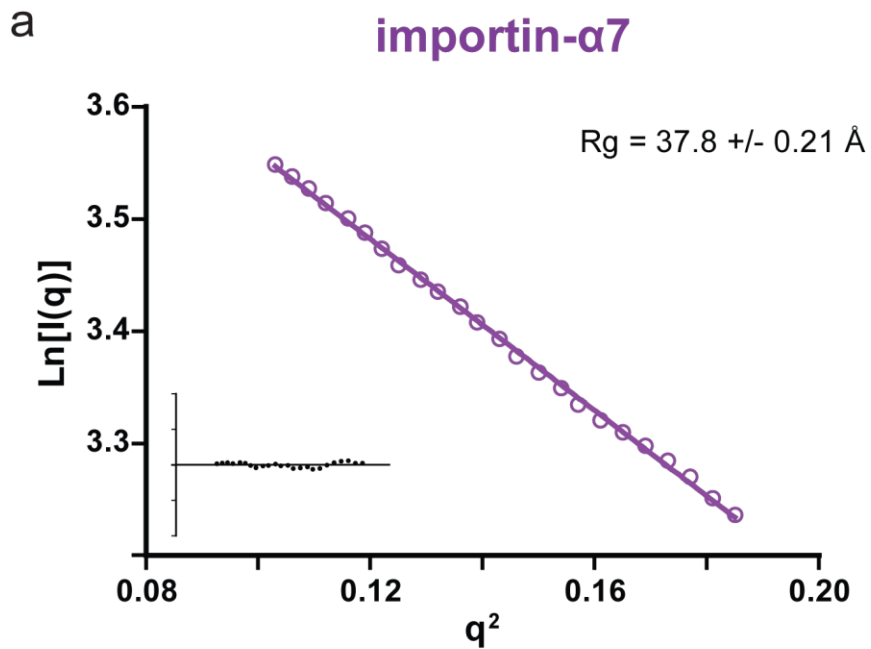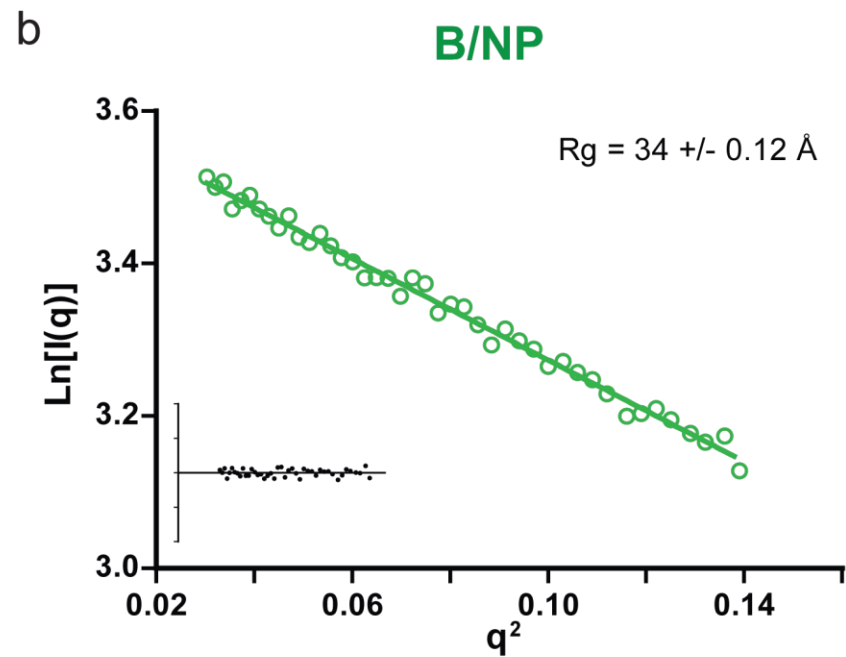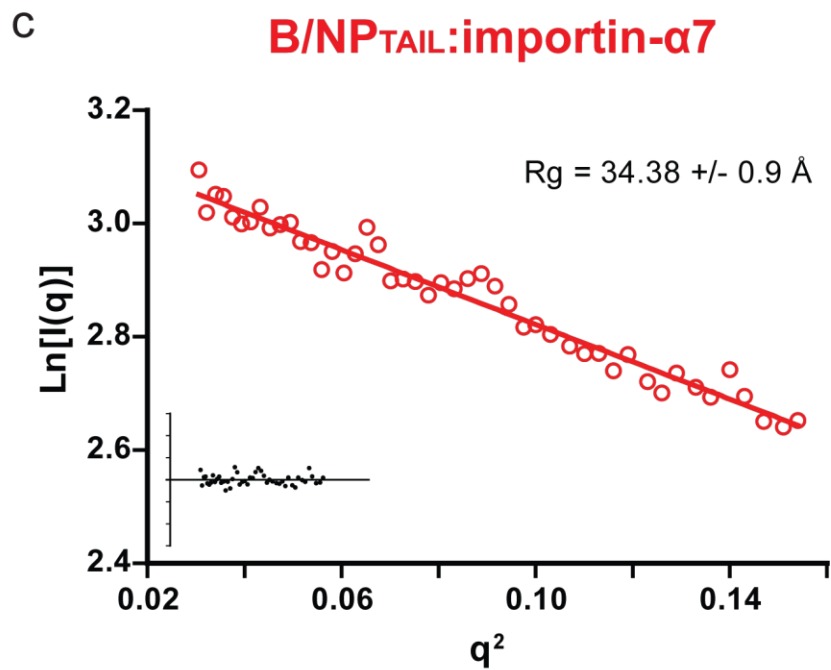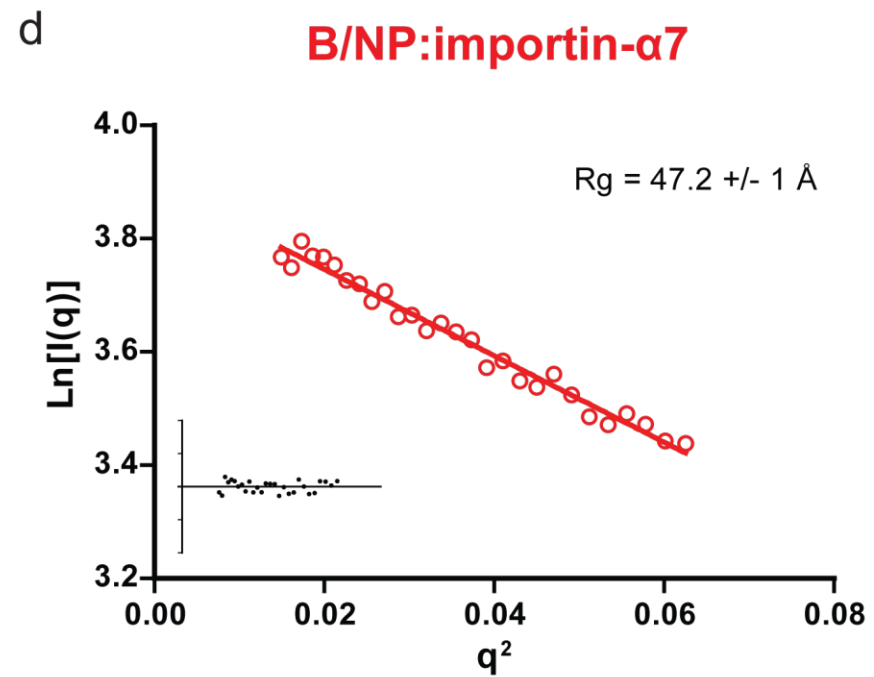

Supplement: 41598_2017_17458_MOESM1_ESM.pdf [file 41598_2017_17458_MOESM1_ESM.pdf]
